# Supplementary material
Source: PubMed Central journal article supplement (PMC7833639)
Supplement: mmc1.pdf [file mmc1.pdf]

## Supplementary information

### Site mapping and small molecule blind docking reveal a possible target site on the SARS-CoV-2 main protease dimer interface

Julia Liang<sup>1,2</sup>, Chris Karagiannis<sup>2,3</sup>, Eleni Pitsillou<sup>1,2</sup>, Kevion K Darmawan<sup>2</sup>, Ken Ng<sup>3</sup>, Andrew Hung<sup>2</sup>, Tom C Karagiannis<sup>1,4,\*</sup>

<sup>1</sup> Epigenomic Medicine, Department of Diabetes, Central Clinical School, Monash University, Melbourne, VIC 3004, Australia

<sup>2</sup> School of Science, College of Science, Engineering & Health, RMIT University, VIC 3001, Australia

<sup>3</sup> School of Agriculture and Food, Faculty of Veterinary and Agricultural Sciences, University of Melbourne, Parkville, VIC 3052, Australia

<sup>4</sup> Department of Clinical Pathology, The University of Melbourne, Parkville, VIC 3052, Australia

**Figure S1.**

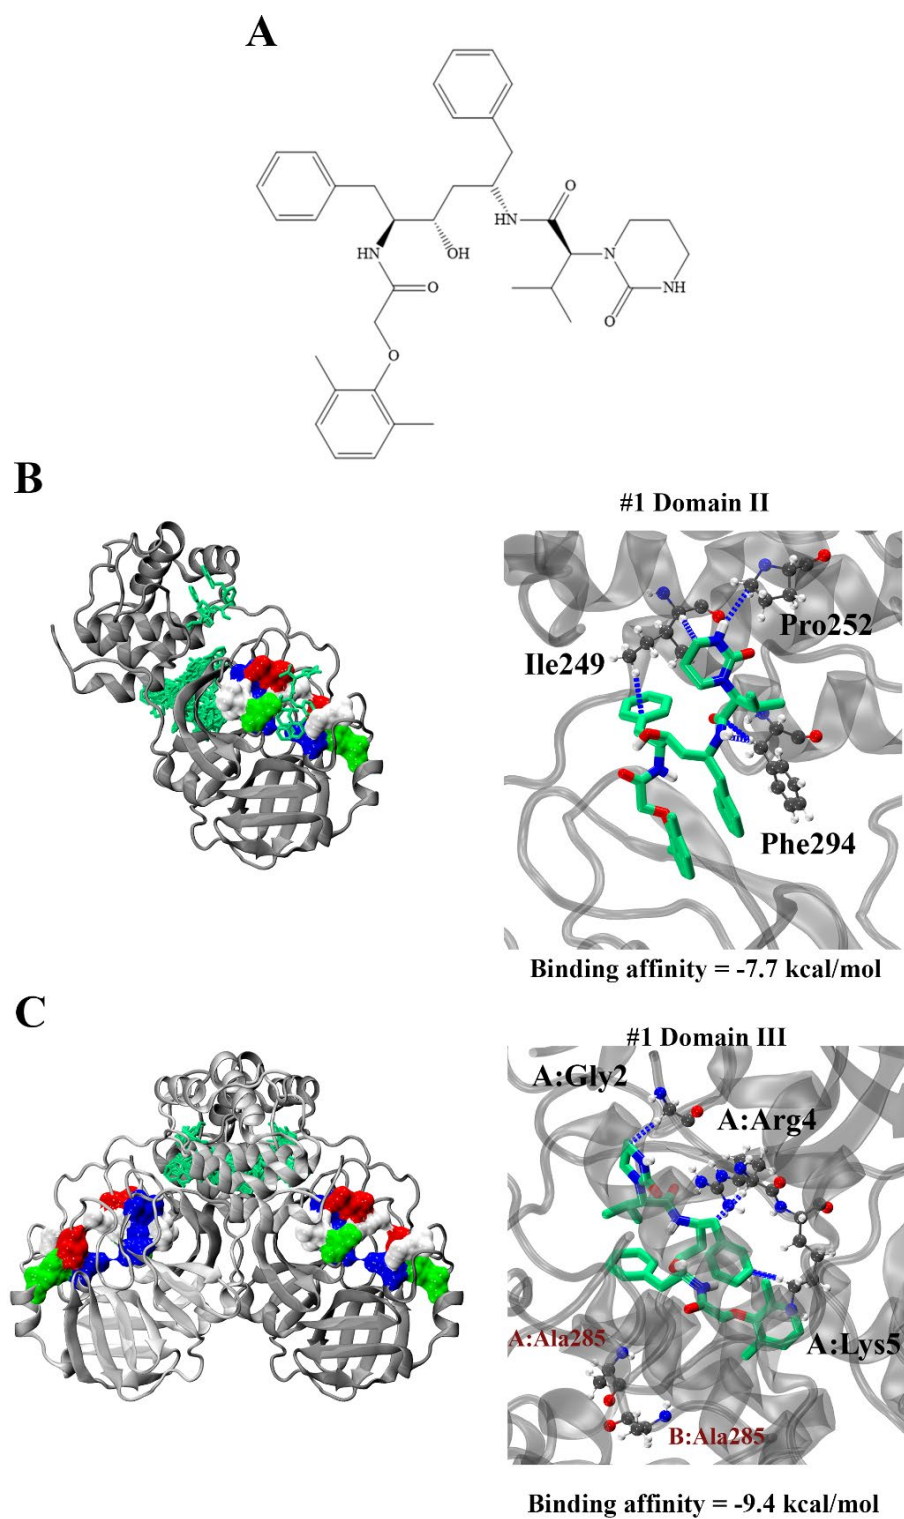

**Figure S1.** Blind docking of lopinavir (A) to SARS-CoV-2 main protease monomer (B) and dimer (C).

Figure. S2.

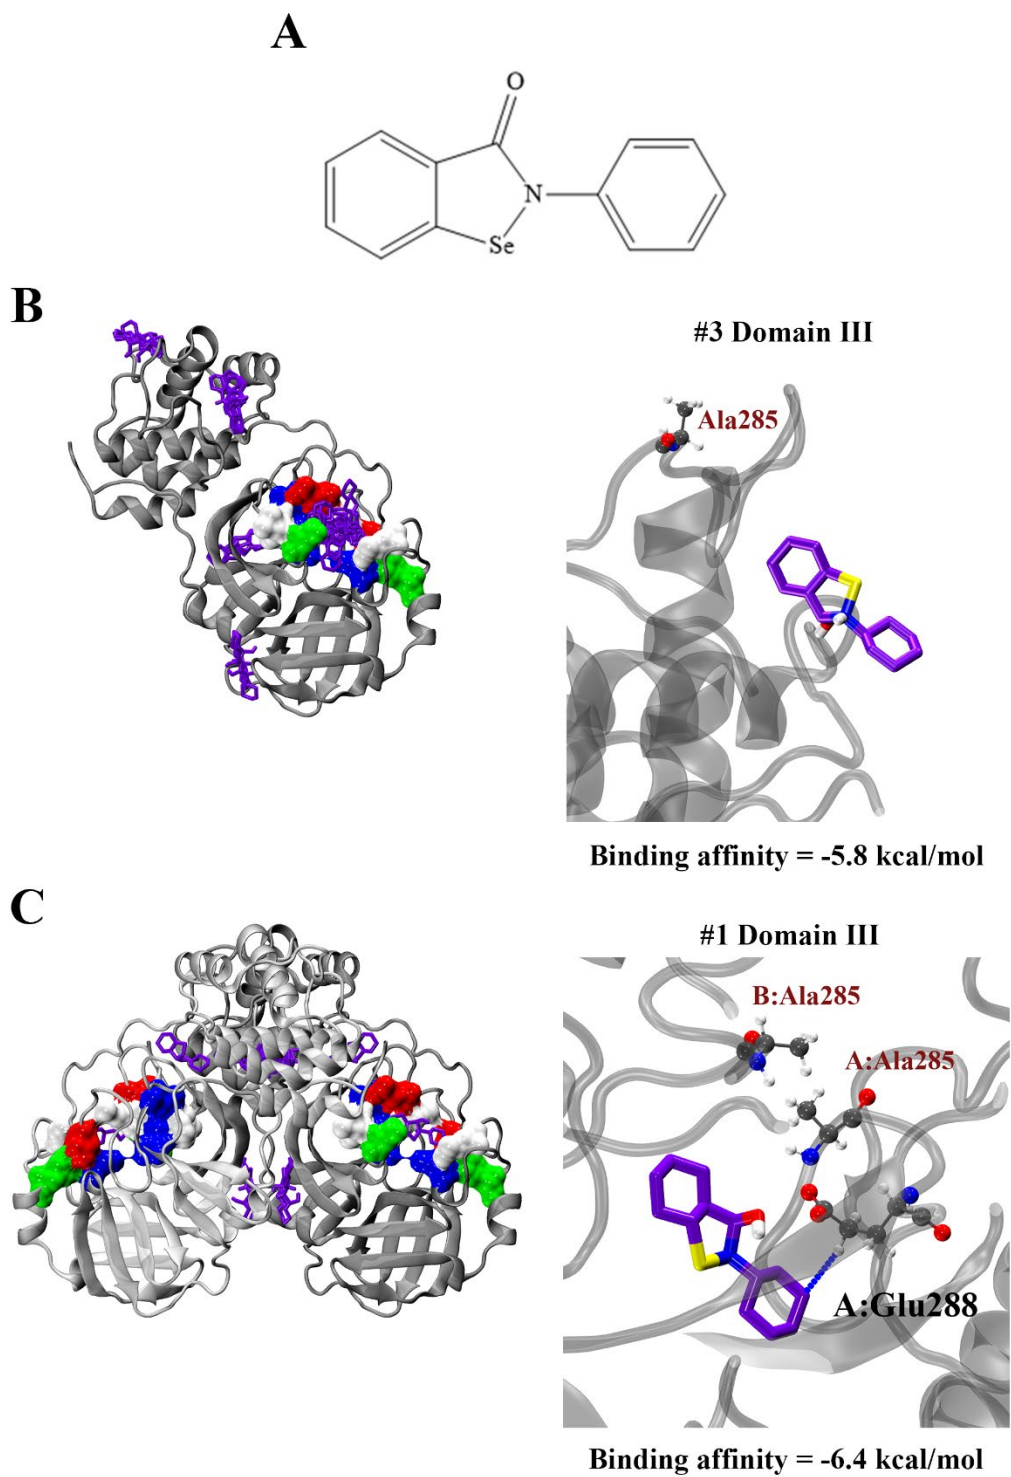

**Figure S2.** Blind docking of ebselen (A) to SARS-CoV-2 main protease monomer (B) and dimer (C).

**Table S1:** Average energy contribution of ligands bound to different regions of SARS-CoV-2 M<sup>Pro</sup> in kcal/mol

| Ligand                  | Binding location | Van der Waal | Electrostatic | Polar solvation | SASA energy | Binding energy |
|-------------------------|------------------|--------------|---------------|-----------------|-------------|----------------|
| $\alpha$ -ketoamide 13b | Protomer A       | -44.0        | -11.0         | 37.5            | -5.2        | <b>-22.7</b>   |
|                         | Protomer B       | -49.6        | -15.3         | 47.0            | -5.5        | <b>-23.5</b>   |
|                         | Domain III       | -59.9        | -23.8         | 84.9            | -6.5        | <b>-5.2</b>    |
| SRT1720                 | Protomer A       | -51.4        | -77.9         | 77.9            | -5.4        | <b>-56.8</b>   |
|                         | Protomer B       | -40.1        | -67.1         | 53.8            | -4.4        | <b>-57.8</b>   |
|                         | Domain III       | -30.2        | -4.9          | 22.1            | -3.4        | <b>-16.4</b>   |
| Ritonavir               | Protomer A       | -38.7        | -5.9          | 31.6            | -4.9        | <b>-17.9</b>   |
|                         | Protomer B       | -40.8        | -9.3          | 37.9            | -5.0        | <b>-17.2</b>   |
|                         | Domain III       | -74.4        | -14.3         | 72.1            | -7.8        | <b>-24.4</b>   |

**Movie S1.**

100 ns trajectory of the apo form of the SARS-CoV-2 main protease

**Movie S2.**

100 ns trajectory of ritonavir bound to the active site of the SARS-CoV-2 main protease

**Movie S3.**

100 ns trajectory of ritonavir bound to the top binding pose in domain III of the SARS-CoV-2 main protease

**Movie S4.**

100 ns trajectory of  $\alpha$ -ketoamide 13b to the active site of the SARS-CoV-2 main protease

**Movie S5.**

100 ns trajectory of  $\alpha$ -ketoamide 13b to the top binding pose in domain III of the of the SARS-CoV-2 main protease

**Movie S6.**

100 ns trajectory of SRT1720 bound to the active site of the SARS-CoV-2 main protease

**Movie S7.**

100 ns trajectory of SRT1720 bound in domain III (binding pose #3) of the SARS-CoV-2 main protease
